# Supplementary material for: The impact of translocations on neutral and functional genetic diversity within and among populations of the Seychelles warbler
Source: PubMed Central journal article supplement (PMC4237152; doi:10.1111/mec.12740), 2014-04-18
Supplement: mec0023-2165-SD4.pdf [file mec0023-2165-SD4.pdf]

**Supplementary table 2:** Pair-wise  $F_{ST}$  between each population sample across five island populations of Seychelles warblers. Microsatellites (lower) and major histocompatibility complex (upper) data.

|                | CN<br>1993 | CN<br>2005 | CN<br>2011 | AR<br>1993 | AR<br>2005 | AR<br>2011 | CE<br>1997 | CE<br>2005 | CE<br>2011 | DS<br>2004 | DS<br>2011 | FR<br>2011 |
|----------------|------------|------------|------------|------------|------------|------------|------------|------------|------------|------------|------------|------------|
| <b>CN 1993</b> |            | 0.000      | 0.000      | 0.005      | 0.011      | 0.006      | 0.001      | 0.003      | 0.004      | 0.000      | 0.004      | 0.000      |
| <b>CN 2005</b> | 0.002      |            | 0.000      | 0.003      | 0.008      | 0.004      | 0.000      | 0.004      | 0.006      | 0.000      | 0.001      | 0.000      |
| <b>CN 2011</b> | 0.006      | 0.003      |            | 0.000      | 0.003      | 0.000      | 0.000      | 0.005      | 0.009      | 0.000      | 0.000      | 0.000      |
| <b>AR 1993</b> | 0.012      | 0.019      | 0.023      |            | 0.000      | 0.000      | 0.000      | 0.011      | 0.021      | 0.000      | 0.000      | 0.000      |
| <b>AR 2005</b> | 0.034      | 0.037      | 0.040      | 0.006      |            | 0.000      | 0.000      | 0.019      | 0.030      | 0.005      | 0.000      | 0.004      |
| <b>AR 2011</b> | 0.033      | 0.034      | 0.039      | 0.006      | 0.017      |            | 0.000      | 0.014      | 0.023      | 0.001      | 0.000      | 0.000      |
| <b>CE 1997</b> | 0.026      | 0.022      | 0.023      | 0.037      | 0.064      | 0.056      |            | 0.004      | 0.010      | 0.000      | 0.000      | 0.000      |
| <b>CE 2005</b> | 0.067      | 0.049      | 0.048      | 0.072      | 0.092      | 0.086      | 0.007      |            | 0.000      | 0.008      | 0.011      | 0.005      |
| <b>CE 2011</b> | 0.045      | 0.032      | 0.032      | 0.058      | 0.085      | 0.084      | 0.006      | 0.000      |            | 0.011      | 0.018      | 0.008      |
| <b>DS 2004</b> | 0.000      | 0.005      | 0.008      | 0.011      | 0.033      | 0.030      | 0.026      | 0.060      | 0.042      |            | 0.000      | 0.000      |
| <b>DS 2011</b> | 0.008      | 0.017      | 0.013      | 0.016      | 0.038      | 0.040      | 0.038      | 0.071      | 0.049      | 0.002      |            | 0.000      |
| <b>FR 2011</b> | 0.005      | 0.003      | 0.000      | 0.024      | 0.040      | 0.040      | 0.020      | 0.046      | 0.029      | 0.006      | 0.011      |            |
