# Supplementary material for: The impact of translocations on neutral and functional genetic diversity within and among populations of the Seychelles warbler
Source: Mol Ecol. 2014 Apr 18;23(9):2165–77. doi: 10.1111/mec.12740 (PMC4237152; doi:10.1111/mec.12740)
Supplement: Table S1 — Null allele estimates for each of 30 microsatellite loci across each catch-year sample period for five island populations of Seychelles warblers where CN=Cousin, AR=Aride, CE=Cousine, DS=Denis and FR=Frégate. Estimates >0.1 highlighted in bold type. [file mec0023-2165-SD3.pdf]

**Supplementary table 1:** Null allele estimates for each of 30 microsatellite loci across each catch-year sample period for five island populations of Seychelles warblers where CN = Cousin, AR = Aride, CE = Cousine, DS = Denis and FR = Frégate. Estimates > 0.1 highlighted in bold type.

| Locus               | CN<br>1993  | CN<br>2005 | CN<br>2011 | AR<br>1993  | AR<br>2005  | AR<br>2011  | CE<br>1997  | CE<br>2005  | CE<br>2011  | DS<br>2004  | DS<br>2011  | FR<br>2011  |
|---------------------|-------------|------------|------------|-------------|-------------|-------------|-------------|-------------|-------------|-------------|-------------|-------------|
| <i>Ase10</i>        | -0.04       | -0.07      | -0.05      | -0.11       | 0.02        | <b>0.24</b> | 0.00        | -0.08       | 0.04        | -0.06       | -0.09       | -0.11       |
| <i>Ase13</i>        | -0.08       | -0.03      | -0.05      | -0.12       | 0.01        | -0.07       | 0.08        | -0.06       | 0.03        | 0.06        | -0.01       | 0.01        |
| <i>Ase18</i>        | -0.04       | 0.01       | 0.00       | -0.04       | -0.09       | 0.00        | 0.01        | -0.04       | -0.02       | 0.00        | -0.09       | -0.06       |
| <i>Ase25</i>        | -0.03       | 0.04       | -0.01      | -0.06       | -0.07       | -0.07       | -0.04       | -0.08       | -0.08       | -0.01       | 0.01        | -0.03       |
| <i>Ase27</i>        | 0.02        | -0.02      | -0.03      | -0.03       | -0.02       | 0.09        | -0.11       | <b>0.15</b> | -0.01       | -0.05       | 0.01        | -0.04       |
| <i>Ase35</i>        | 0.01        | 0.07       | 0.00       | -0.02       | -0.06       | 0.02        | -0.01       | 0.07        | <b>0.17</b> | -0.04       | 0.07        | 0.00        |
| <i>Ase37</i>        | 0.02        | 0.03       | -0.02      | -0.06       | -0.05       | 0.10        | 0.02        | -0.02       | 0.01        | 0.04        | -0.04       | -0.04       |
| <i>Ase4</i>         | -0.08       | 0.01       | -0.07      | <b>0.40</b> | -0.09       | -0.07       | 0.10        | -0.01       | <b>0.16</b> | -0.03       | 0.01        | 0.02        |
| <i>Ase42</i>        | -0.11       | -0.04      | 0.02       | -0.12       | -0.06       | 0.07        | -0.05       | <b>0.11</b> | 0.07        | -0.05       | 0.06        | -0.02       |
| <i>Ase48</i>        | -0.02       | -0.01      | -0.10      | -0.11       | -0.05       | -0.14       | -0.03       | -0.11       | 0.02        | -0.03       | 0.06        | -0.02       |
| <i>Ase56</i>        | -0.03       | 0.05       | 0.01       | -0.08       | -0.06       | -0.05       | -0.06       | -0.04       | -0.04       | 0.05        | -0.01       | <b>0.14</b> |
| <i>Ase58</i>        | -0.02       | 0.02       | -0.03      | 0.01        | -0.10       | -0.11       | -0.05       | 0.06        | -0.04       | -0.04       | 0.00        | -0.04       |
| <i>Ase6</i>         | -0.02       | 0.02       | 0.01       | 0.00        | -0.04       | -0.03       | -0.04       | -0.03       | -0.07       | -0.03       | -0.09       | 0.04        |
| <i>Ase9</i>         | -0.06       | -0.01      | 0.04       | 0.03        | -0.13       | -0.10       | -0.17       | 0.04        | -0.07       | 0.03        | 0.00        | -0.03       |
| <i>Ase11</i>        | -0.09       | 0.00       | 0.01       | -0.04       | -0.12       | -0.09       | <b>0.20</b> | -0.03       | 0.07        | -0.02       | -0.08       | <b>0.11</b> |
| <i>Ase16</i>        | 0.01        | -0.01      | 0.02       | -0.04       | -0.06       | 0.01        | 0.05        | -0.03       | -0.07       | 0.01        | -0.02       | -0.05       |
| <i>Ase19</i>        | 0.07        | 0.00       | -0.04      | -0.06       | -0.07       | <b>0.17</b> | 0.08        | -0.02       | -0.05       | 0.01        | 0.08        | 0.00        |
| <i>Ase22</i>        | -0.13       | 0.09       | -0.01      | <b>0.11</b> | -0.03       | -0.08       | 0.09        | -0.08       | 0.09        | 0.01        | <b>0.11</b> | 0.09        |
| <i>Ase3</i>         | -0.12       | -0.02      | 0.03       | <b>0.10</b> | <b>0.21</b> | <b>0.14</b> | -0.02       | -0.02       | 0.04        | -0.01       | <b>0.15</b> | 0.02        |
| <i>Ase38</i>        | -0.04       | 0.00       | -0.02      | -0.23       | 0.00        | -0.08       | -0.16       | 0.03        | 0.04        | -0.03       | -0.12       | <b>0.13</b> |
| <i>Ase53</i>        | 0.00        | -0.04      | 0.06       | <b>0.11</b> | -0.09       | 0.00        | -0.06       | 0.05        | 0.06        | 0.06        | -0.04       | -0.03       |
| <i>Ase55-CEST</i>   | -0.03       | 0.06       | -0.01      | -0.03       | -0.20       | 0.03        | -0.03       | 0.05        | -0.01       | 0.03        | -0.07       | -0.06       |
| <i>Ase61</i>        | 0.05        | 0.06       | 0.04       | -0.08       | -0.01       | <b>0.11</b> | 0.00        | -0.14       | -0.12       | 0.00        | -0.03       | 0.02        |
| <i>Ase64</i>        | 0.03        | -0.01      | -0.03      | 0.02        | -0.06       | 0.04        | 0.10        | -0.07       | -0.05       | 0.04        | -0.12       | -0.03       |
| <i>Ase7</i>         | -0.04       | 0.08       | -0.05      | -0.08       | 0.07        | -0.04       | 0.00        | 0.01        | 0.00        | 0.02        | -0.13       | -0.07       |
| <i>Calex-08-Gga</i> | <b>0.13</b> | 0.00       | -0.02      | -0.11       | -0.16       | <b>0.11</b> | 0.00        | 0.00        | 0.00        | -0.04       | 0.03        | -0.03       |
| <i>Cuμ4-Gga5</i>    | 0.01        | 0.01       | -0.09      | -0.15       | -0.02       | -0.04       | -0.12       | -0.02       | -0.07       | <b>0.12</b> | 0.02        | -0.08       |
| <i>Pdop6</i>        | 0.03        | 0.02       | 0.01       | 0.02        | -0.06       | 0.02        | 0.00        | 0.03        | -0.13       | 0.03        | 0.07        | 0.02        |
| <i>PmaTGAn42</i>    | 0.03        | 0.00       | -0.06      | <b>0.31</b> | -0.07       | 0.09        | 0.00        | 0.04        | -0.11       | -0.07       | -0.06       | <b>0.12</b> |
| <i>Pte24-CEST</i>   | 0.00        | 0.00       | 0.00       | 0.00        | 0.00        | -0.01       | 0.00        | 0.00        | 0.00        | 0.00        | 0.00        | 0.00        |
